# Supplementary material for: Effects of gait speed on paraspinal muscle activation: an sEMG analysis of the multifidus and erector spinae
Source: PeerJ journal article supplement (doi:10.7717/peerj.19244), 2025-04-11
Supplement: Data.xlsx [file Data.xlsx]

## Sheet: Data
Sex	Age	Height	Weight	BMI	L - MES L	L - MM L	L - MES R	L - MM R	S - MES L	S - MM L	S - MES R	S - MM R	1km/h - MES L	1km/h - MM L	1km/h - MES R	1km/h - MM R	3km/h - MES L	3km/h - MM L	3km/h - MES R	3km/h - MM R	5km/h - MES L	5km/h - MM L	5km/h - MES R	5km/h - MM R	6km/h - MES L	6km/h - MM L	6km/h - MES R	6km/h - MM R	1km/h to 3km/h - MES L	1km/h to 3km/h - MM L	1km/h to 3km/h - MES R	1km/h to 3km/h - MM R	3km/h to 5km/h - MES L	3km/h to 5km/h - MM L	3km/h to 5km/h - MES R	3km/h to 5km/h - MM R	5km/h to 6km/h - MES L	5km/h to 6km/h - MM L	5km/h to 6km/h - MES R	5km/h to 6km/h - MM R
M	22	185	84	24.5435	7.01754	2.22222	4.31655	9.80392	8.77193	3.33333	6.47482	9.80392	10.5263	12.2222	10.7914	6.86275	14.0351	16.6667	12.9496	8.82353	20.1754	17.7778	19.4245	11.7647	26.3158	21.1111	24.4604	10.7843	1.33333	1.36364	1.2	1.28571	1.4375	1.06667	1.5	1.33333	1.30435	1.1875	1.25926	0.916667
K	21	175	64	20.898	7.25806	1.55039	4.6875	6.52174	8.87097	3.10078	7.03125	7.24638	13.7097	9.30233	11.7188	10.1449	16.129	15.5039	16.4062	15.2174	28.2258	26.3566	29.6875	22.4638	39.5161	51.938	26.5625	39.1304	1.17647	1.66667	1.4	1.5	1.75	1.7	1.80952	1.47619	1.4	1.97059	0.894737	1.74194
K	21	167	64	22.9481	8.14815	2.5641	13.7931	12	6.66667	5.12821	6.89655	13.3333	15.5556	19.2308	14.9425	26.6667	16.2963	21.7949	17.2414	29.3333	20	28.2051	21.8391	34.6667	25.9259	35.8974	28.7356	41.3333	1.04762	1.13333	1.15385	1.1	1.22727	1.29412	1.26667	1.18182	1.2963	1.27273	1.31579	1.19231
K	21	165	65	23.8751	14.9123	3.44828	27.619	10.5882	15.7895	5.74713	35.2381	11.7647	13.1579	22.9885	20	30.5882	18.4211	22.9885	86.6667	29.4118	29.8246	56.3218	26.6667	80	42.1053	72.4138	43.8095	92.9412	1.4	1	4.33333	0.961538	1.61905	2.45	0.307692	2.72	1.41176	1.28571	1.64286	1.16176
K	21	168	55	19.487	7.97872	1.72414	3.26797	8.77193	4.25532	1.72414	4.57516	8.77193	26.0638	16.6667	76.4706	31.5789	27.1277	16.6667	49.0196	32.4561	29.7872	21.2644	41.1765	43.8596	31.9149	21.8391	35.2941	45.614	1.04082	1	0.641026	1.02778	1.09804	1.27586	0.84	1.35135	1.07143	1.02703	0.857143	1.04
M	33	172	80	27.0416	9.00901	2.06897	6.86275	8.84956	14.4144	7.58621	20.5882	16.8142	21.6216	26.2069	20.5882	29.2035	22.5225	27.5862	23.5294	33.6283	24.3243	30.3448	24.5098	35.3982	26.1261	36.5517	27.451	38.0531	1.04167	1.05263	1.14286	1.15152	1.08	1.1	1.04167	1.05263	1.07407	1.20455	1.12	1.075
K	21	170	68	23.5294	16.9811	5.08475	8.69565	15.873	24.5283	13.5593	14.1304	17.4603	28.3019	42.3729	19.5652	42.8571	35.8491	47.4576	23.913	65.0794	41.5094	59.322	27.1739	101.587	49.0566	88.1356	31.5217	95.2381	1.26667	1.12	1.22222	1.51852	1.15789	1.25	1.13636	1.56098	1.18182	1.48571	1.16	0.9375
K	21	167	52	18.6453	6.14525	3	3.42466	6.36943	5.02793	4	4.79452	8.28025	7.26257	12	9.58904	14.0127	10.0559	18	13.6986	16.5605	15.6425	28	20.5479	21.0191	21.2291	35	26.7123	24.8408	1.38462	1.5	1.42857	1.18182	1.55556	1.55556	1.5	1.26923	1.35714	1.25	1.3	1.18182
M	21	180	74	22.8395	4.34783	0.952381	3.84615	3.34448	4.83092	4.44444	5.49451	6.35452	5.31401	8.57143	7.14286	9.699	6.28019	10.4762	8.24176	11.7057	8.21256	10.7937	12.6374	11.7057	9.17874	12.0635	15.3846	11.3712	1.18182	1.22222	1.15385	1.2069	1.30769	1.0303	1.53333	1	1.11765	1.11765	1.21739	0.971429
M	23	180	83	25.6173	19.2308	3.125	4.5977	8.91089	15.3846	3.125	5.74713	10.8911	12.8205	9.375	8.04598	13.8614	16.6667	34.375	18.3908	27.7228	24.359	31.25	26.4368	38.6139	33.3333	73.9583	29.8851	51.4851	1.3	3.66667	2.28571	2	1.46154	0.909091	1.4375	1.39286	1.36842	2.36667	1.13043	1.33333
M	21	179	81	25.2801	5.71429	2.41935	4.85437	9.18367	9.52381	3.22581	5.82524	11.2245	332.381	12.9032	178.641	15.3061	280	13.7097	163.107	18.3673	234.286	15.3226	151.456	18.3673	168.571	22.5806	124.272	21.4286	0.842407	1.0625	0.913043	1.2	0.836735	1.11765	0.928571	1	0.719512	1.47368	0.820513	1.16667
K	21	171	60	20.5191	8.69565	2.72727	5.37634	10.4167	8.69565	2.72727	7.52688	10.4167	11.9565	9.09091	11.828	12.5	11.9565	9.09091	9.67742	12.5	25	39.0909	49.4624	25	29.3478	71.8182	75.2688	30.2083	1	1	0.818182	1	2.09091	4.3	5.11111	2	1.17391	1.83721	1.52174	1.20833
M	21	181	71	21.6721	0.687285	0.260191	0.536193	1.18765	1.03093	0.780572	0.80429	1.90024	1.60367	1.12749	0.893655	1.78147	13.2875	13.7901	10.3664	18.171	17.984	19.4276	13.7623	23.1591	20.1604	20.7285	15.1921	25.2969	8.28571	12.2308	11.6	10.2	1.35345	1.40881	1.32759	1.27451	1.12102	1.06696	1.1039	1.09231
M	22	180	90	27.7778	3.21285	2.38095	3.65297	6.875	5.22088	1.78571	2.28311	6.25	6.0241	8.33333	7.30594	12.5	7.63052	10.7143	9.13242	15	8.83534	10.7143	10.5023	15	11.6466	11.9048	13.242	16.875	1.26667	1.28571	1.25	1.2	1.15789	1	1.15	1	1.31818	1.11111	1.26087	1.125
M	21	182	98	29.5858	3.44828	4.34783	3.97351	8.49057	5.74713	6.95652	5.96026	10.3774	12.069	11.3043	11.9205	14.1509	16.6667	16.5217	14.5695	17.9245	29.8851	23.4783	19.2053	16.9811	46.5517	27.8261	23.1788	34.9057	1.38095	1.46154	1.22222	1.26667	1.7931	1.42105	1.31818	0.947368	1.55769	1.18519	1.2069	2.05556
K	21	173	88	29.4029	3.30579	0.517241	0.947867	2.23124	2.20386	1.2069	1.4218	2.63692	3.0303	3.7931	3.08057	4.66531	3.85675	4.82759	4.02844	6.08519	4.95868	5.51724	5.21327	7.91075	5.50964	6.37931	5.92417	14.1988	1.27273	1.27273	1.30769	1.30435	1.28571	1.14286	1.29412	1.3	1.11111	1.15625	1.13636	1.79487
K	23	160	60	23.4375	6.18557	2.40964	4.44444	18.8679	7.21649	6.0241	5.55556	18.8679	19.5876	20.4819	21.1111	28.3019	18.5567	24.0964	26.6667	35.8491	25.7732	33.7349	33.3333	66.0377	34.0206	43.3735	47.7778	116.981	0.947368	1.17647	1.26316	1.26667	1.38889	1.4	1.25	1.84211	1.32	1.28571	1.43333	1.77143
K	22	160	49	19.1406	17.3913	6.38298	4.21053	23.913	19.5652	6.38298	5.26316	26.087	23.913	36.1702	16.8421	45.6522	28.2609	44.6809	17.8947	60.8696	34.7826	46.8085	23.1579	65.2174	41.3043	68.0851	31.5789	106.522	1.18182	1.23529	1.0625	1.33333	1.23077	1.04762	1.29412	1.07143	1.1875	1.45455	1.36364	1.63333
K	21	165	55	20.202	6.86275	2.0202	2.01342	6.89655	5.88235	5.05051	3.3557	8.27586	129.412	23.2323	14.094	23.4483	83.3333	29.2929	15.4362	22.7586	55.8824	81.8182	20.8054	27.5862	52.9412	123.232	24.1611	34.4828	0.643939	1.26087	1.09524	0.970588	0.670588	2.7931	1.34783	1.21212	0.947368	1.50617	1.16129	1.25
K	23	163	70	26.3465	13.6364	9.67742	6.34921	25.7143	18.1818	16.129	11.1111	28.5714	25	41.9355	19.0476	40	29.5455	45.1613	22.2222	42.8571	50	51.6129	30.1587	71.4286	61.3636	74.1935	46.0317	105.714	1.18182	1.07692	1.16667	1.07143	1.69231	1.14286	1.35714	1.66667	1.22727	1.4375	1.52632	1.48
K	23	159	76	30.0621	10.1266	4.08163	7.22892	17.7778	12.6582	10.2041	9.63855	20	32.9114	59.1837	26.506	46.6667	45.5696	100	36.1446	75.5556	58.2278	134.694	49.3976	135.556	77.2152	142.857	72.2892	135.556	1.38462	1.68966	1.36364	1.61905	1.27778	1.34694	1.36667	1.79412	1.32609	1.06061	1.46341	1
K	22	164	55	20.4491	6.86275	2.91262	4.54545	12.6437	8.82353	3.8835	4.54545	11.4943	26.4706	18.4466	12.5	19.5402	21.5686	23.301	14.7727	25.2874	29.4118	27.1845	20.4545	29.8851	36.2745	33.9806	27.2727	40.2299	0.814815	1.26316	1.18182	1.29412	1.36364	1.16667	1.38462	1.18182	1.23333	1.25	1.33333	1.34615
K	22	175	64	20.898	11.6667	8.69565	8.47458	18.1818	13.3333	8.69565	11.8644	18.1818	13.3333	17.3913	11.8644	23.6364	20	52.1739	37.2881	45.4545	26.6667	106.522	37.2881	36.3636	28.3333	128.261	55.9322	43.6364	1.5	3	3.14286	1.92308	1.33333	2.04167	1	0.8	1.0625	1.20408	1.5	1.2
K	22	158	51	20.4294	6.59341	4.34783	5.95238	11.3402	8.79121	4.34783	8.33333	10.3093	20.8791	21.7391	13.0952	23.7113	21.978	19.5652	17.8571	22.6804	35.1648	25	25	25.7732	46.1538	28.2609	35.7143	30.9278	1.05263	0.9	1.36364	0.956522	1.6	1.27778	1.4	1.13636	1.3125	1.13043	1.42857	1.2
K	22	173	67	22.3863	9.09091	6	6.45161	13.8462	10.2273	10	11.828	16.9231	22.7273	70	21.5054	27.6923	29.5455	96	29.0323	30.7692	53.4091	116	22.5806	44.6154	60.2273	160	65.5914	44.6154	1.3	1.37143	1.35	1.11111	1.80769	1.20833	0.777778	1.45	1.12766	1.37931	2.90476	1
M	24	175	75	24.4898	2.43902	5	1.57895	5.42169	5.36585	17.5	3.15789	7.83133	11.2195	27.5	14.7368	16.8675	17.0732	43.75	20.5263	21.0843	22.9268	58.75	24.7368	25.3012	14.1463	31.25	13.1579	18.0723	1.52174	1.59091	1.39286	1.25	1.34286	1.34286	1.20513	1.2	0.617021	0.531915	0.531915	0.714286
M	26	190	78	21.6066	3.37079	2.35294	2.48447	7.63889	5.05618	2.94118	2.48447	7.63889	9.55056	11.1765	8.69565	13.1944	14.0449	14.1176	11.8012	20.1389	20.2247	15.2941	13.6646	20.1389	15.1685	16.4706	15.528	18.0556	1.47059	1.26316	1.35714	1.52632	1.44	1.08333	1.15789	1	0.75	1.07692	1.13636	0.896552
K	23	157	80	32.4557	8.92857	5.55556	5.17241	9.41176	12.5	5.55556	13.7931	11.7647	30.3571	26.3889	15.5172	24.7059	30.3571	18.0556	91.3793	45.8824	105.357	105.556	48.2759	96.4706	148.214	126.389	89.6552	169.412	1	0.684211	5.88889	1.85714	3.47059	5.84615	0.528302	2.10256	1.40678	1.19737	1.85714	1.7561
K	22	166	60	21.7738	8	8.88889	5.71429	19.6078	10.6667	11.1111	8.57143	21.5686	18.6667	35.5556	27.1429	29.4118	24	57.7778	51.4286	43.1373	28	68.8889	100	56.8627	36	104.444	167.143	72.549	1.28571	1.625	1.89474	1.46667	1.16667	1.19231	1.94444	1.31818	1.28571	1.51613	1.67143	1.27586
M	26	185	107	31.2637	6.31579	4.54545	4.90196	12.0482	9.47368	4.54545	9.80392	14.4578	16.8421	25	17.6471	26.506	22.1053	31.8182	25.4902	31.3253	34.7368	54.5455	37.2549	39.759	44.2105	115.909	47.0588	59.0361	1.3125	1.27273	1.44444	1.18182	1.57143	1.71429	1.46154	1.26923	1.27273	2.125	1.26316	1.48485
K	24	170	57	19.7232	3.97727	1.04712	3.47826	6.32911	9.65909	2.6178	6.08696	10.1266	11.9318	19.8953	13.0435	20.8861	15.3409	24.0838	18.2609	28.481	23.2955	33.5079	21.7391	29.7468	26.1364	45.5497	23.4783	32.2785	1.28571	1.21053	1.4	1.36364	1.51852	1.3913	1.19048	1.04444	1.12195	1.35938	1.08	1.08511

## Sheet: Description 
Sex	Sex of participant
Age	Age of participant
Height	Height of participant
Weight	Weight of participant
BMI	BMI of participant
L - MES L	% MVIC of left erector spinae muscle during lying
L - MM L	% MVIC of left multifidus muscle during lying
L - MES R	% MVIC of right erector spinae muscle during lying
L - MM R	% MVIC of right multifidus muscle during lying
S - MES L	% MVIC of left erector spinae muscle during sitting
S - MM L	% MVIC of left multifidus muscle during sitting
S - MES R	% MVIC of right erector spinae muscle during sitting
S - MM R	% MVIC of right multifidus muscle during sitting
1km/h - MES L	% MVIC of left erector spinae muscle during walking at 1 km/h
1km/h - MM L	% MVIC of left multifidus muscle during walking at 1 km/h
1km/h - MES R	% MVIC of right erector spinae muscle during walking at 1 km/h
1km/h - MM R	% MVIC of right multifidus muscle during walking at 1 km/h
3km/h - MES L	% MVIC of left erector spinae muscle during walking at 3 km/h
3km/h - MM L	% MVIC of left multifidus muscle during walking at 3 km/h
3km/h - MES R	% MVIC of right erector spinae muscle during walking at 3 km/h
3km/h - MM R	% MVIC of right multifidus muscle during walking at 3 km/h
5km/h - MES L	% MVIC of left erector spinae muscle during walking at 5 km/h
5km/h - MM L	% MVIC of left multifidus muscle during walking at 5 km/h
5km/h - MES R	% MVIC of right erector spinae muscle during walking at 5 km/h
5km/h - MM R	% MVIC of right multifidus muscle during walking at 5 km/h
6km/h - MES L	% MVIC of left erector spinae muscle during walking at 6 km/h
6km/h - MM L	% MVIC of left multifidus muscle during walking at 6 km/h
6km/h - MES R	% MVIC of right erector spinae muscle during walking at 6 km/h
6km/h - MM R	% MVIC of right multifidus muscle during walking at 6 km/h
1km/h to 3km/h - MES L	growth factor of left erector spinae muscle from 1km/h to 3 km/h
1km/h to 3km/h - MM L	growth factor of left multifidus muscle from 1km/h to 3 km/h
1km/h to 3km/h - MES R	growth factor of right erector spinae muscle from 1km/h to 3 km/h
1km/h to 3km/h - MM R	growth factor of right multifidus muscle from 1km/h to 3 km/h
3km/h to 5km/h - MES L	growth factor of left erector spinae muscle from 3km/h to 5 km/h
3km/h to 5km/h - MM L	growth factor of left multifidus muscle from 3km/h to 5 km/h
3km/h to 5km/h - MES R	growth factor of right erector spinae muscle from 3km/h to 5 km/h
3km/h to 5km/h - MM R	growth factor of right multifidus muscle from 3km/h to 5 km/h
5km/h to 6km/h - MES L	growth factor of left erector spinae muscle from 5km/h to 6 km/h
5km/h to 6km/h - MM L	growth factor of left multifidus muscle from 5km/h to 6 km/h
5km/h to 6km/h - MES R	growth factor of right erector spinae muscle from 5km/h to 6 km/h
5km/h to 6km/h - MM R	growth factor of right multifidus muscle from 5km/h to 6 km/h
